# Supplementary material for: Cs2ZnCl4: a lead-free all-inorganic perovskite with a large dielectric permittivity
Source: Royal Society of Chemistry journal article supplement (doi:10.1039/d4ra04755a), 2024-01-01
Supplement: d4ra04755a1.pdf [file d4ra04755a1.pdf]

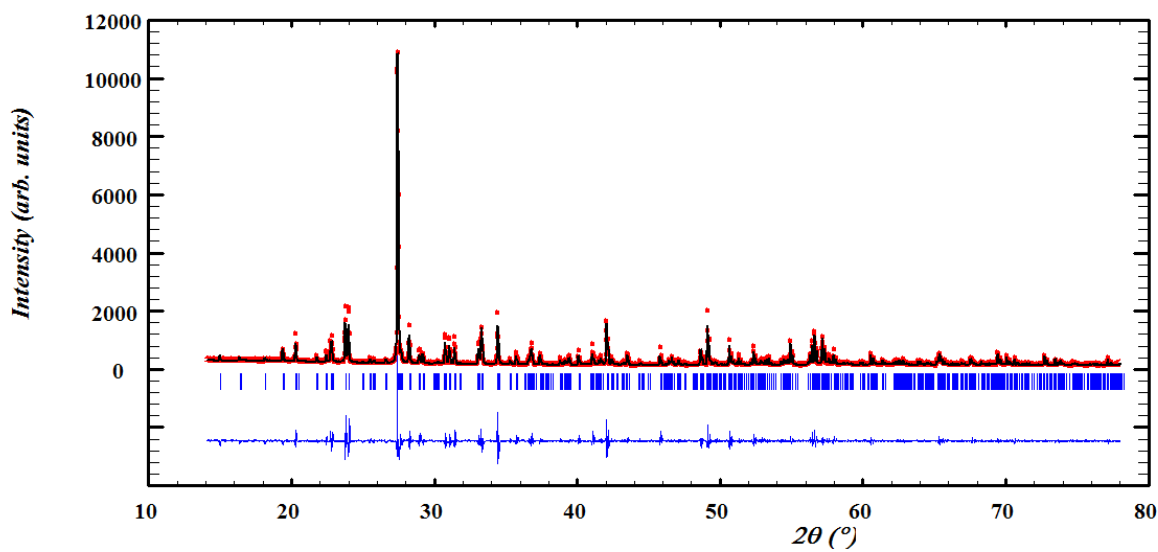

Figure S1 :XRD pattern of  $\text{Cs}_2\text{ZnCl}_4$

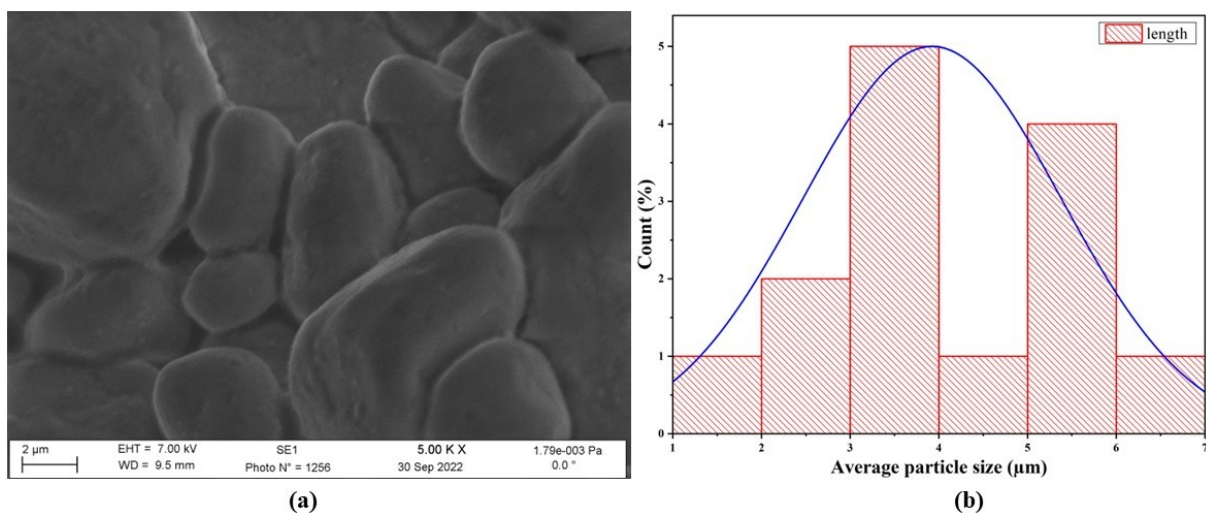

Figure S2 : a) SEM image, b) Particle size distribution of  $\text{Cs}_2\text{ZnCl}_4$

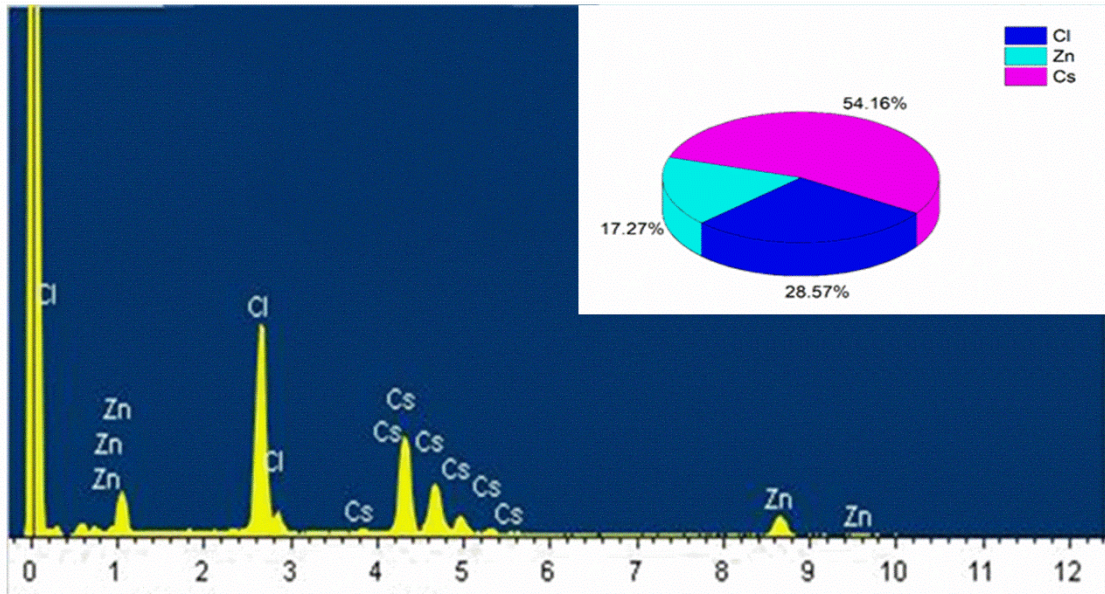

Figure S3: Elemental analysis by EDX
